# Supplementary material for: Genome-wide methylation analysis in Silver–Russell syndrome, Temple syndrome, and Prader–Willi syndrome
Source: PubMed Central journal article supplement (PMC7583213; doi:10.1186/s13148-020-00949-8), 2020-10-22
Supplement: 13148_2020_949_MOESM6_ESM.pdf [file 13148_2020_949_MOESM6_ESM.pdf]

**Supplementary Figure S2.** The workflow of the bioinformatics analysis. CH-*t*-test, Crawford-Howell *t* test; SRS, Silver-Russell syndrome; TS14, Temple syndrome; PWS, Prader-Willi syndrome; iDMRs, imprinting-associated differentially methylated regions; MLID, multilocus imprinting disturbance.
